# Supplementary material
Source: publisher figshare collection journal article supplement (https://karger.figshare.com/ndownloader/files/25670558)
Supplement: Supplementary file 1 [file 25670558]

Supplement Table 1. Participating institutions and number of patients enrolled from each institution

| **Institution** | **N (%)** |
| --- | --- |
| Asan Medical Center | 316 (34.4) |
| Seoul Natinoal University Hospital | 180 (19.6) |
| Samsung Medical Center | 137 (14.9) |
| Yonsei University College of Medicine | 93 (10.1) |
| Seoul National University Bundang Hospital | 63 (6.9) |
| Gangnam Severence Hospital | 38 (4.1) |
| Seoul St. Mary’s Hospital | 27 (2.9) |
| Chonnam National University Hwasun Hospital | 22 (2.4) |
| Keimyung University Dongsan Medical Center | 14 (1.5) |
| Ewha Womans University Mokdong Hospital | 7 (0.8) |
| Chung-Ang University Hospital | 6 (0.7) |
| Gyeongsang National University Hospital | 6 (0.7) |
| Dong-A University Hospital | 5 (0.5) |
| Chonnam National University Hospital | 4 (0.4) |
| **Total** | **918 (100)** |
